# Supplementary material
Source: Elsevier journal article supplement (https://www.sciencedirect.com/science/article/pii/S0366317521000558)
Supplement: mmc1 [file S0366317521000558:mmc1.doc]

1. **Rapid removal of fluoride from water using core@shell and @shell nanoparticles of SiO2@ZrO2 and @ZrO2. Investigation of the mechanisms involved and impact of elemental leaching**

# Supplementary Information

# Deduction of equation (8)

|  |  | (1) |
| --- | --- | --- |

|  |  | (2) |
| --- | --- | --- |

|  |  | (3) |
| --- | --- | --- |

|  |  | (4) |
| --- | --- | --- |

|  |  | (5) |
| --- | --- | --- |

|  |  | (6) |
| --- | --- | --- |

Introducing (4) in (6) yields

|  |  |  | (7) |
| --- | --- | --- | --- |

Where (7) is shown above.

Replacing ppmZr and ppmF by [Zr] and [F-] in (7) yields:

|  |  | (8) |
| --- | --- | --- |

|  |
| --- |
| **Figure S1.** The size distribution of solid core@shell and @shell particles in dilute dispersions. |

| 1. **Table S1.** The concentration of elements Na, Si and Zr (ppm) in the liquid phase measured with ICP-MS for each of the four types of material in the 17 different experiments performed in each face-centered central composite experimental |
| --- |


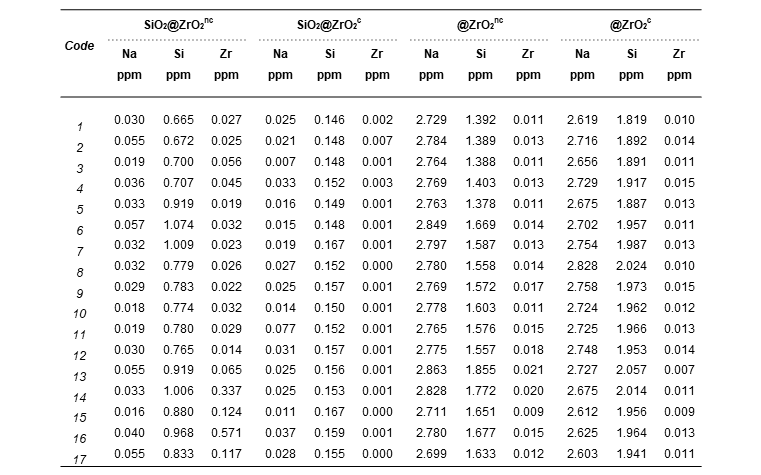


| 1. 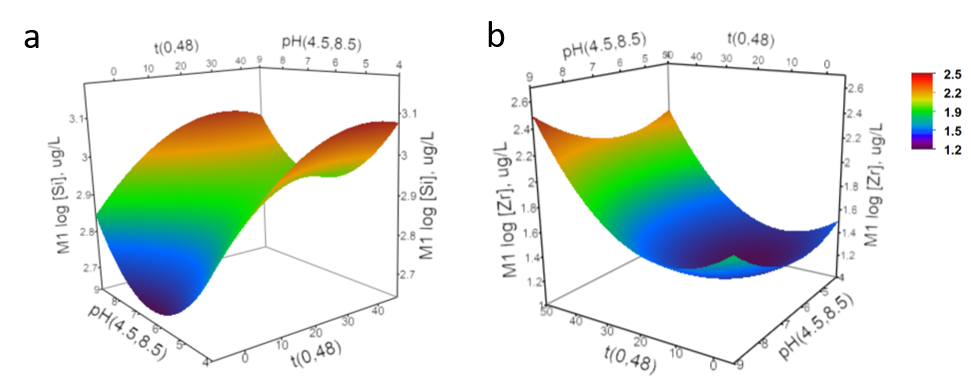 2. **Figure S2**. Modeled response surface plot showing the log concentration of leached a) Si and b) Zr as a function of pH and time. |  |
| --- | --- |

| 1. 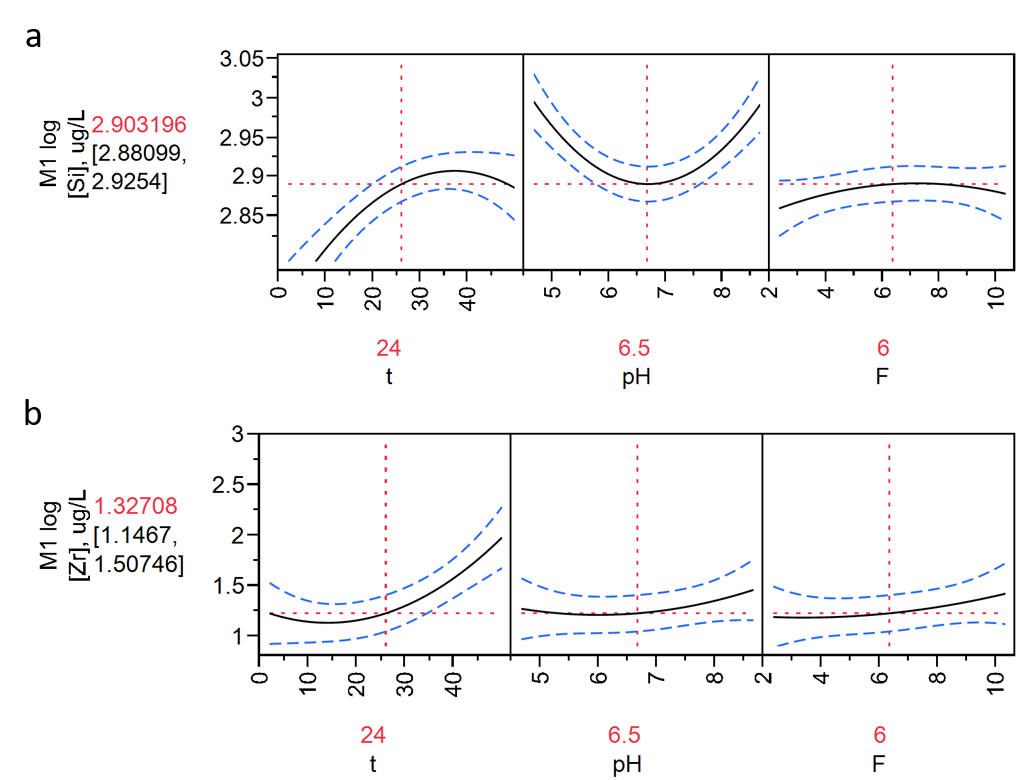 2. **Figure S3**. Predicted individual response plots showing the log concentration of leached a) Si and b) Zr as a function of pH and time. To calculate an individual response the remaining variables were fixed to t= 24, pH = 6.5 and [F] = 6 ppm. |
| --- |
